# Supplementary material for: First Molecular Identification and Prevalence of Sarcocystis spp. in Sheep Intended for Human Consumption in Shanxi Province, China
Source: MDPI journal article supplement (doi:10.3390/vetsci11100504), 2024-10-14
Supplement: s1 [file s1]

Supplementary materials

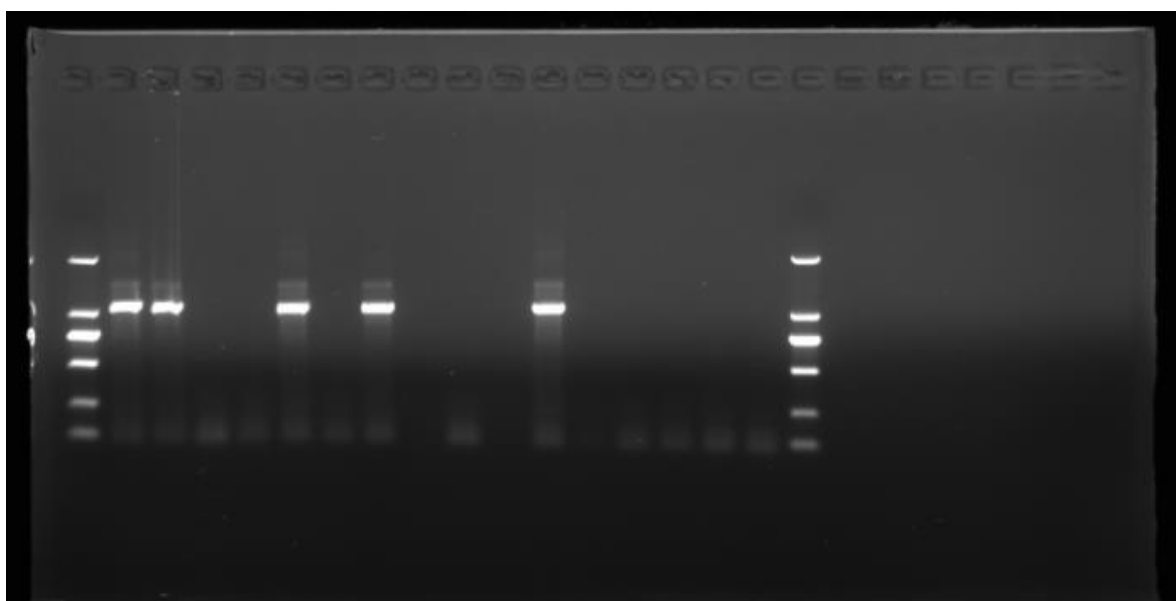

Figure S1: Original Gel Image
